# Supplementary material
Source: HighWire-hosted journal article supplement (https://erj.ersjournals.com/content/59/4/2200024)
Supplement: inline-supplementary-material-1 [file inline-supplementary-material-1.pdf]

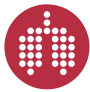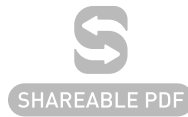

# Temporal progression of mediastinal lymphadenopathy in idiopathic pulmonary fibrosis

Tim J.M. Wallis<sup>1,2</sup>, Eyjólfur Gudmundsson<sup>3</sup>, Katarina Pontoppidan<sup>1</sup>, Nesrin Mogulkoc<sup>4</sup>, Recep Savaş<sup>5</sup>, Ömer Selim Unat<sup>4</sup>, Katharine Vedwan<sup>6</sup>, Sobana Battison<sup>6</sup>, Fiona J. Thompson<sup>1</sup>, Christopher J. Brereton<sup>1,2</sup>, Ben G. Marshall<sup>1,2</sup>, Sophie V. Fletcher<sup>1,2</sup>, Luca Richeldi<sup>1,7</sup>, Joseph Jacob<sup>1,3,8</sup> and Mark G. Jones<sup>1,2</sup>

<sup>1</sup>National Institute for Health Research Southampton Biomedical Research Centre, University Hospital Southampton, Southampton, UK. <sup>2</sup>School of Clinical and Experimental Sciences, Faculty of Medicine, University of Southampton, Southampton, UK. <sup>3</sup>Centre for Medical Image Computing, University College London, London, UK. <sup>4</sup>Dept of Respiratory Medicine, Ege University Hospital, Izmir, Turkey. <sup>5</sup>Dept of Radiology, Ege University Hospital, Izmir, Turkey. <sup>6</sup>Dept of Cardiothoracic Radiology, University Hospital Southampton, Southampton, UK. <sup>7</sup>Unità Operativa Complessa di Pneumologia, Università Cattolica del Sacro Cuore, Fondazione Policlinico A. Gemelli, Rome, Italy. <sup>8</sup>UCL Respiratory, University College London, London, UK.

Corresponding author: Tim J.M. Wallis (Timothy.Wallis@soton.ac.uk)

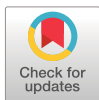

Shareable abstract (@ERSpublications)

**In two separate cohorts of patients with idiopathic pulmonary fibrosis, mediastinal adenopathy was common and an increase in the size of lymphadenopathy independently predicts mortality**  
<https://bit.ly/32vEMnX>

**Cite this article as:** Wallis TJM, Gudmundsson E, Pontoppidan K, *et al.* Temporal progression of mediastinal lymphadenopathy in idiopathic pulmonary fibrosis. *Eur Respir J* 2022; 59: 2200024 [DOI: 10.1183/13993003.00024-2022].

This single-page version can be shared freely online.

Copyright ©The authors 2022. For reproduction rights and permissions contact [permissions@ersnet.org](mailto:permissions@ersnet.org)

Received: 2 Sept 2021  
Accepted: 16 Jan 2022

*To the Editor:*

Idiopathic pulmonary fibrosis (IPF) is a progressive fibrotic interstitial lung disease (ILD) with limited therapeutic options and poor prognosis. [1] The average life expectancy from diagnosis is 2 to 4 years [2]; however, predicting an individual patient disease trajectory is challenging and there are no established clinically available disease biomarkers [3]. Computed tomography (CT) scanning of the chest is an essential part of the diagnostic pathway in IPF with characteristic appearances of usual interstitial pneumonia (UIP) [4]. In addition, mediastinal lymphadenopathy (MLN) has been described with high prevalence (52–92%) in IPF cohorts [5–9]. Previous studies have identified that the presence of MLN is linked to disease severity and can independently predict reduced survival in IPF [10, 11] and ILD [9]. The presence of MLN has been shown to persist on longitudinal imaging in the majority of patients with IPF who have MLN at baseline [11]. However, whilst temporal progression of MLN has been shown to correlate with worsening CT fibrosis score [6], whether temporal progression of MLN in IPF confers an additional impact on mortality is unknown. In this study we investigated temporal trends in MLN and their impact on survival in patients with IPF in two independent cohorts.
